# Supplementary material for: A nano-biosensing platform based on CuS-BSA for label-free fluorescence detection of Escherichia coli
Source: Royal Society of Chemistry journal article supplement (doi:10.1039/d4an01060d), 2024-01-01
Supplement: d4an01060d1.pdf [file d4an01060d1.pdf]

## A nano-biosensing platform based on CuS-BSA for label-free fluorescent detection of *Escherichia coli*

Xiaoqing Zhang <sup>a</sup>, Shanglin Li <sup>a</sup>, Mei Liu <sup>a,\*</sup>

<sup>a</sup> College of Food Engineering and Nutritional Science, Shaanxi Normal University, Xi'an 710119, China

\*Corresponding author

E-mail: [liumei@snnu.edu.cn](mailto:liumei@snnu.edu.cn)

Phone: 86-29-85310517, Fax: 86-29-85310517

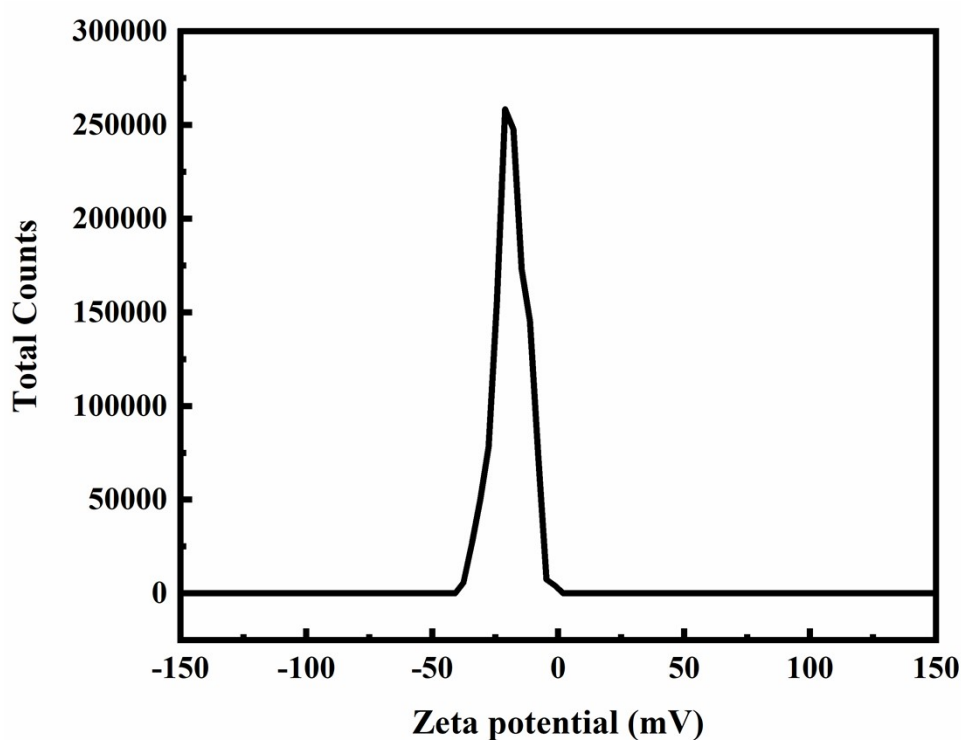

Fig. S1 Zeta potential curve of CuS-BSA nanoparticles in aqueous medium.

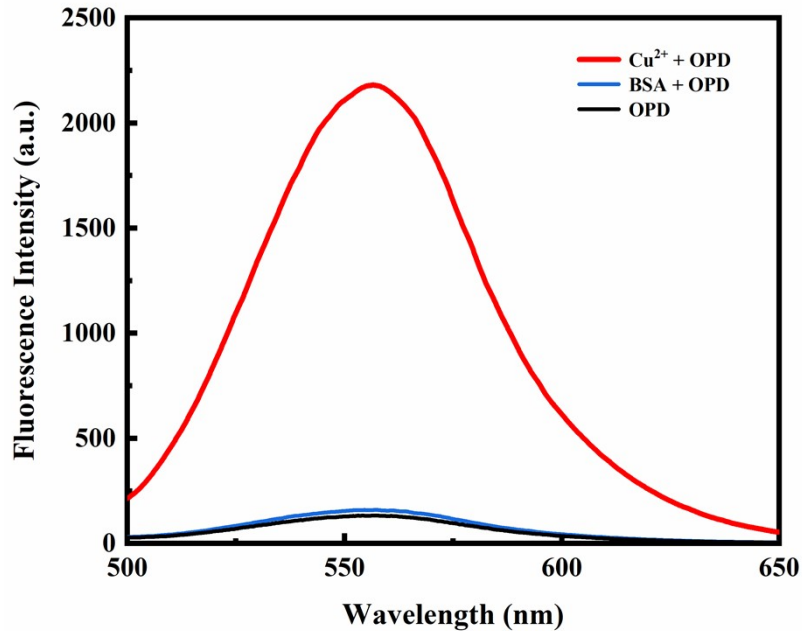

**Fig. S2** Fluorescence emission spectrum of Cu<sup>2+</sup>+ OPD (red line), BSA + OPD (blue line) and OPD (black line).

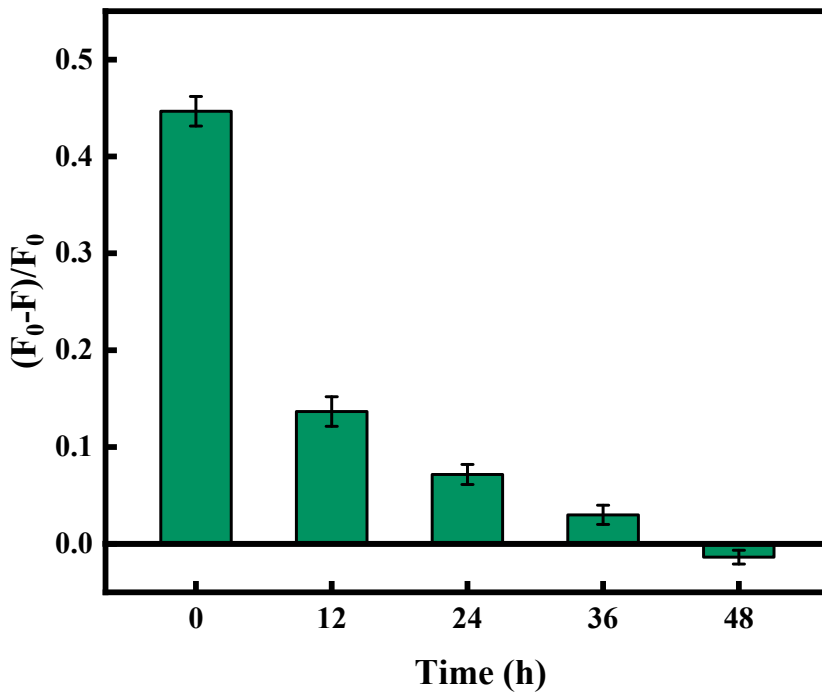

**Fig.S3** Fluorescence signal-to-noise ratio of *E. coli* dead cells on the detection system with respect to time.

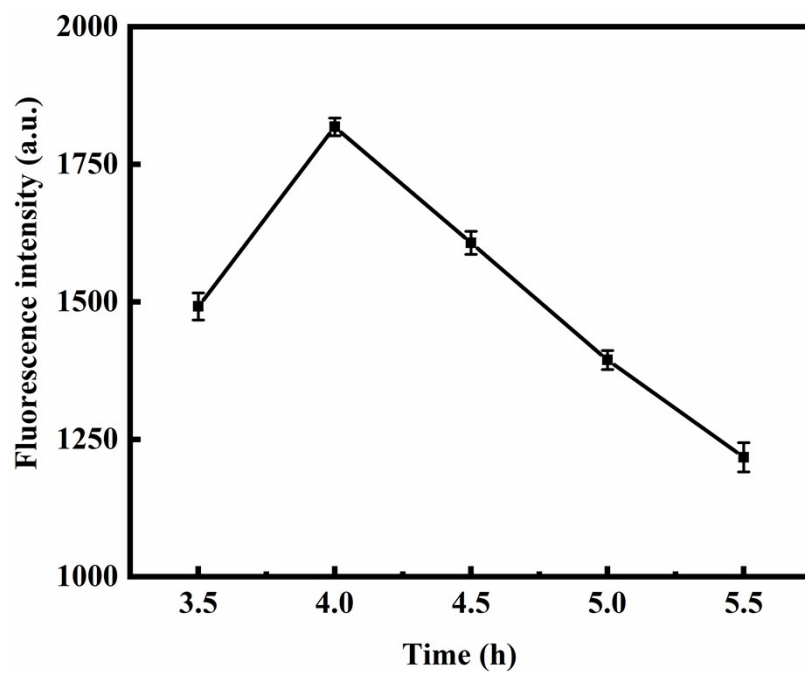

**Fig. S4** Effect of the synthesis time of CuS-BSA on its catalyzed OPD system.

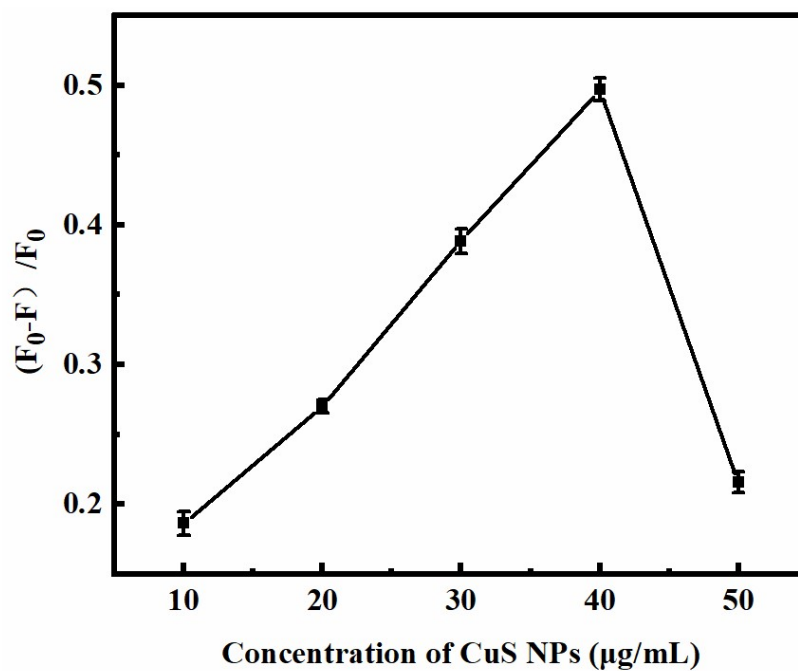

**Fig. S5** The influence of CuS-BSA concentration on the fluorescence signal-to-noise ratio of the detection system.

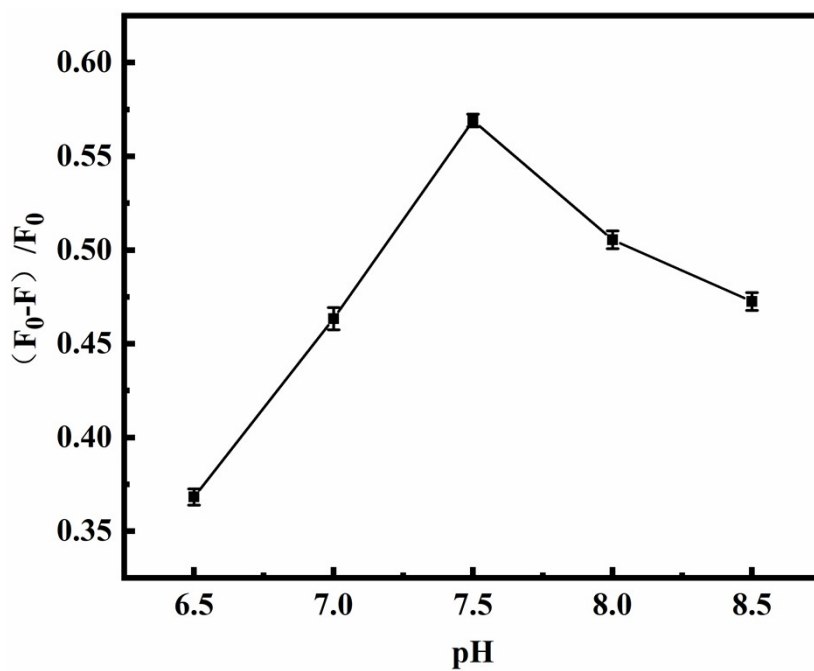

**Fig. S6** The influence of different pH on the fluorescence signal-to-noise ratio of the detection system.

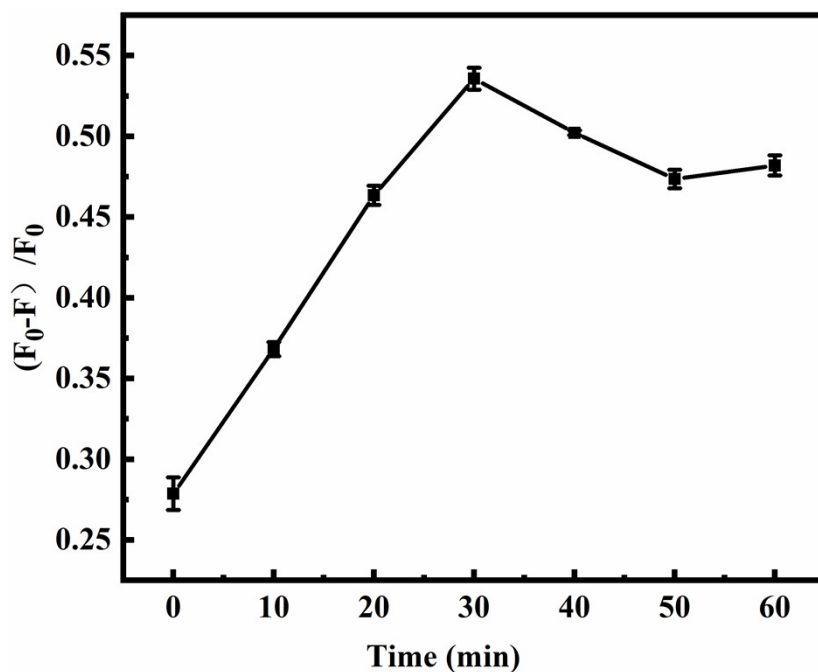

**Fig. S7** The effect of mixing incubation time of CuS-BSA with *E. coli* on the fluorescence signal-to-noise ratio of the detection system.

**Table S1 Comparison of the developed biosensing system with other reported methods for the determination of *E. coli*.**

| Detection method            | Linear Range (CFU/mL)                 | LOD (CFU/mL)      | Reference        |
|-----------------------------|---------------------------------------|-------------------|------------------|
| Immunochromatographic assay | $10^2 - 2 \times 10^8$                | $10^3$            | 1                |
| Colorimetric assay          | $5.0 \times 10^2 - 5.0 \times 10^3$   | 116               | 2                |
| Electrochemical assay       | $20 - 2 \times 10^6$                  | 20                | 3                |
| Fluorescence method         | $1 \times 10^2 - 1 \times 10^8$       | 60                | 4                |
| Fluorescence method         | $3.3 \times 10^3 - 10^6$              | $9.2 \times 10^2$ | 5                |
| Fluorescence method         | $1.12 \times 10^3 - 1.12 \times 10^7$ | 58                | 6                |
| Fluorescence method         | $10^2 - 10^5$                         | $10^2$            | 7                |
| Fluorescence method         | $12 - 1.2 \times 10^7$                | 9                 | <b>This work</b> |

## References

1. Y. Lu, S. Wang, X. Cai, M. Cao, Q. Lu, D. Hu, Q. Chen and X. Xiong, *Front. Microbiol.*, 2023, **14**, 1294368.
2. J. Li, W. Yun, H. Zhang, L. Chen, H.-P. Ho, X. Pu, Y. Huang, Y. Shen and H. Cao, *Colloid Surf. A-Physicochem. Eng. Asp.*, 2023, **674**, 131955.
3. S. Bazsefidpar, M. Freitas, C. R. Pereira, G. Gutierrez, E. Serrano-Pertierra, H. P. A. Nouws, M. Matos, C. Delerue-Matos and M. C. Blanco-Lopez, *Biosensors-Basel*, 2023, **13**, 13050567.
4. X. Bai, L. Ga and J. Ai, *Analyst*, 2023, **148**, 3892-3898.
5. B. Fang, J. Peng, G. Zhang, K. Xing, W. Chen, D. Liu, S. Shan, Y. Xiong and W. Lai, *J. Dairy Sci.*, 2022, **105**, 2922-2930.
6. S. Ye, T. Han, M. Cheng and L. Dong, *Sens. Actuator B-Chem.*, 2022, **356**, 131332.
7. B. Hong, Y. Li, W. Wang, Y. Ma and J. Wang, *Microchim. Acta*, 2023, **190**, 202.
